# Supplementary material for: Industry Development Tendency and Innovation Strategy Preference of Five Typical Industries under the Background of Low‐Carbon Sustainable Development in China
Source: Hindawi journal article supplement (doi:10.1155/2022/4418669), 2022-01-01
Supplement: f1 [file 4418669.f1.pdf]

| company property | number of employees | number of R&D researchers | industry type |
|------------------|---------------------|---------------------------|---------------|
| E                | G                   | F                         | 1             |
| A                | C                   | D                         | 3             |
| C                | F                   | G                         | 2             |
| C                | B                   | A                         | 5             |
| A                | E                   | F                         | 4             |
| A                | G                   | G                         | 2             |
| D                | E                   | D                         | 1             |
| E                | C                   | C                         | 5             |
| D                | C                   | C                         | 3             |
| C                | D                   | D                         | 3             |
| C                | B                   | C                         | 2             |
| C                | A                   | B                         | 4             |
| C                | G                   | G                         | 2             |
| C                | B                   | C                         | 4             |
| A                | G                   | G                         | 2             |
| A                | D                   | A                         | 3             |
| A                | B                   | A                         | 3             |
| C                | D                   | D                         | 1             |
| A                | E                   | B                         | 3             |
| A                | A                   | A                         | 5             |
| E                | G                   | G                         | 5             |
| C                | B                   | C                         | 2             |
| C                | C                   | D                         | 2             |
| C                | A                   | B                         | 1             |
| C                | B                   | C                         | 4             |
| C                | B                   | B                         | 2             |
| A                | D                   | E                         | 5             |
| A                | B                   | B                         | 5             |
| F                | D                   | D                         | 3             |
| A                | E                   | B                         | 45            |
| E                | E                   | B                         | 3             |
| B                | E                   | C                         | 2             |
| C                | B                   | C                         | 1             |
| AE               | G                   | G                         | 2             |
| A                | C                   | C                         | 5             |
| A                | E                   | A                         |               |
| D                | G                   | G                         | 3             |
| C.               | B.                  | A.                        | 1             |
| C                | E                   | F                         | 3             |

|   |   |   |   |
|---|---|---|---|
| C | B | A | 5 |
| C | C | A | 1 |
| A | G | G | 3 |
| C | A | A | 1 |
| C | E | G | 3 |
| C | C | C | 2 |
| C | B | B | 2 |
| C | C | D | 2 |
| A | G | G | 1 |
| C | G | G | 2 |
| A | B | C | 5 |
| C | G | D | 1 |
| D | E | B | 3 |
| C | B | E | 4 |
| C | C | B | 3 |
| A | D | A | 3 |
| C | C | B | 3 |
| c | A | A | 5 |
| A | E | A | 1 |
| C | A | B | 5 |
| A | B | B | 4 |
| A | A | B | 5 |
| C | C | C | 5 |
| A | G | G | 3 |
| C | G | A | 5 |
| E | A | A | 5 |
| C | D | D | 1 |
|   | G | G | 2 |
| C | A | B | 5 |
| C | G | G | 2 |
| C | B | B | 4 |
| A | A | A | 2 |
| A | F | E | 2 |
| C | D | D | 1 |
| C | A | A | 3 |
| C | E | D | 3 |
| F | E | E | 3 |
| C | B | A | 5 |
| C | C | B | 4 |
| C | A | B | 5 |

|    |    |   |       |
|----|----|---|-------|
| E  | A  | A | 4     |
| A  | E  | A | 3     |
| E  | G  | C | 3     |
| C  | B  | B | 4     |
| E  | C  | A | 1     |
| A  | G  | G | 4     |
| C  | A  | A | 5     |
| B  | A  | B | 5     |
| C  | B  | A | 5     |
| C  | A  | A | 1     |
| C  | C  | C | 3     |
| C  | B  | A | 5     |
| D  | E  | F | 4     |
| E  | C  | C | 4     |
| A  | G  | D | 3     |
| C  | B  | B | 2     |
| A  | C  | C | 3     |
| C  | B  | E | 4     |
| D  | G  | G | 3     |
| C  | B  | B | 5     |
| C  | A  | A | 3     |
| E  | C  | C | 1     |
| C  | G  | G | 4     |
| C  | A  | B | 5     |
| A  | G  | G | 2     |
| A. | D. | G | 5     |
| A  | G  | E | 5     |
| C  | D  | C | 2     |
| A  | E  | B | (4\5) |
| A  | G  | G | 2     |
| A  | G  | G | 4     |
| A  | B  | B | 5     |
| E  | B  | A | 3     |
| C  | C  | B | 1     |
| D  | A  | F | 4     |
| C  | B  | C | 2     |
| D  | A  | F | 4     |
| C  | B  | A | 4     |
| C  | B  | A | 5     |
| C  | E  | F | 2     |

A C  
C C  
C C  
E A  
C C  
C C  
A C  
C C  
C C  
C C  
A C  
C C  
C C  
A C  
C F  
A C  
C C  
C C  
C C  
A C  
C C  
C f  
C D  
A

EDAGACEBFAABBCAGDEABBEDBGBABCFFAEgCGC

E  
D  
B  
G  
B  
B  
E  
A  
B  
G  
A  
B  
B  
B  
C  
A  
C  
D  
B  
D  
B  
A  
B  
G  
B  
B  
B  
D  
B  
A  
D  
C  
C  
C  
A  
A  
A  
C  
B  
G  
C

1  
1  
5  
5  
2  
1  
4  
5  
5  
2  
1  
5  
2  
1  
2  
1  
2  
3  
4  
4  
2  
2  
5  
3  
4  
1  
2  
1  
4  
1  
4  
1  
5  
5  
5  
1  
5  
5  
3  
3  
2

|   |   |   |   |
|---|---|---|---|
| C | F | C | 4 |
| A | C | C | 3 |
| D | C | A | 4 |
| D | A | F | 4 |
| D | G | G | 5 |
| C | D | B | 2 |
| A | G | G | 3 |
| C | A | A | 5 |
| A | G | G | 2 |
| f | g | c | 5 |
| A | G | G | 3 |
| C | G | G | 5 |
| C | C | C | 1 |
| C | E | G | 3 |
| A | G | E | 5 |
| C | D | D | 5 |
| C | B | B | 2 |
| A | G | G | 2 |
| A | A | A | 5 |
| C | B | B | 3 |
| C | A | A | 1 |
| D | G | G | 3 |
| C | B | A | 5 |
| A | E | G | 2 |
| A | E | A | 2 |
| C | C | C | 3 |
| C | C | A | 1 |
| A | B | A | 3 |
| A | G | G | 5 |
| A | G | E | 3 |
| C | A | B | 5 |
| C | E | C | 2 |
| C | B | C | 2 |
| A | D | E | 5 |
| D | G | D | 3 |
| C | B | A | 1 |
| C | B | A | 5 |
| D | A | F | 4 |
| A | C | C | 4 |
| C | B | A | 2 |

|   |   |   |    |
|---|---|---|----|
| F | B | A | 5  |
| A | G | G | 3  |
| C | B | A | 5  |
| A | C | D | 3  |
| C | D | D | 4  |
| C | A | A | 5  |
| C | C | A | 3  |
| C | B | A | 5  |
| C | E | A | 5  |
| C | C | C | 1  |
| A | G | G | 3  |
| C | A | C | 5  |
| C | B | B | 1  |
| C | A | A | 5  |
| C | B | C | 2  |
| C | C | D | B  |
| C | B | C | 4  |
| A | B | C | 4  |
| A | G | G | 2  |
| C | G | E | 5  |
| C | G | F | 3  |
| A | G | F | 4  |
| C | C | C | 2  |
| C | D | C | 2  |
| A | G | G | 3  |
| C | C | B | 3  |
| A | G | G | 5  |
| C | A | A | 2  |
| C | A | A | 45 |
| C | E | C | 1  |
| C | G | C | 3  |
| E | G | G | 3  |
| C | A | G | 4  |
| C | D | A | 2  |
| C | G | B | 2  |
| A | C | G | 5  |
| C | G | D | 5  |
| C | B | G | 2  |
| F | G | B | 4  |
|   |   | F | 4  |

C  
A  
C  
B  
C  
C  
C  
D  
C  
C  
A  
C  
C  
C  
A  
A  
C  
A  
C  
A  
D  
C  
C  
A  
B  
C  
A  
A  
A  
C  
A  
D  
C  
C  
C  
A  
C  
C  
C  
A  
C

B  
B  
A  
B  
B  
D  
B  
A  
G  
B  
F  
B  
A  
B  
F  
A  
A  
D  
B  
G  
G  
B  
E  
D  
C  
G  
B  
A  
G  
C  
G  
A  
D  
B  
G  
A  
B  
C  
G  
A

B  
B  
A  
A  
B  
D  
B  
A  
F  
C  
D  
C  
A  
A  
D  
B  
A  
A  
B  
D  
G  
A  
A  
C  
C  
G  
C  
A  
G  
B  
B  
D  
B  
B  
G  
A  
C  
A  
G  
A

2  
3  
5  
5  
4  
4  
2  
3  
2  
2  
3  
2  
1  
4  
1  
2  
1  
5  
2  
3  
2  
1  
5  
5  
2  
3  
5  
3  
4  
3  
5  
5  
2  
3  
1  
3  
2  
1  
3  
3

|     |   |   |   |
|-----|---|---|---|
| E   | G | F | 3 |
| 股份制 | G | G | 5 |
| C   | B | C | 2 |
| C   | D | B | 2 |
| A   | G | G | 3 |
| B   | G | G | 5 |
| C   | E | D | 3 |
| C   | A | A | 5 |
| E   | A | A | 5 |
| A   | A | A | 5 |
| C   | A | A | 3 |
| C   | A | B | 3 |
| C   | E | B | 3 |
| C   | A | A | 2 |
| A   | B | C | 5 |
| C   | D | A | 1 |
| C   | B | A | 5 |
| C   | D | D | 4 |
| C   | B | C | 2 |
| C   | B | C | 5 |
| C   | C | C | 3 |
| A   | B | A | 5 |
| C   | C | D | 5 |
| C   | G | G | 2 |
| C   | G | G | 3 |
| C   | C | C | 5 |
| C   | D | B | 2 |
| A   | A | A | 5 |
| D   | D | C | 3 |
| A   | B | A | 2 |
| C   | B | B | 4 |
| A   | D | C | 3 |
| C   | A | B | 2 |
| A   | G | G | 3 |
| C   | A | A | 5 |
| C   | A | A | 2 |
| D   | E | C | 1 |
| A   | G | F | 3 |
| E   | B | B | 1 |
| A   | B | A | 5 |



|   |   |   |   |
|---|---|---|---|
| E | B | A | 1 |
| A | G | G | 2 |
| A | G | G | 2 |
| A | G | G | 3 |
| D | D | D | 4 |
| C | C | A | 3 |
| C | A | A | 3 |
| C | D | C | 2 |
| A | A | B | 5 |
| A | A | A | 5 |
| C | B | C | 4 |
| A | D | A | 3 |
| F | B | B | 2 |
| F | C | C | 5 |
| A | B | A | 5 |
| C | B | E | 4 |
| A | D | A | 3 |
| C | G | G | 2 |

| C1 | C2 | C3 | C4 | C5 | C6 | C7 | C8 | D1 | D2 | D3 | D4 | D5 | D6 | D7 | D8 | D9 | D10 |
|----|----|----|----|----|----|----|----|----|----|----|----|----|----|----|----|----|-----|
| 6  | 6  | 3  | 5  | 5  | 5  | 5  | 4  | 6  | 5  | 3  | 6  | 6  | 3  | 6  | 4  | 3  | 3   |
| 3  | 3  | 2  | 3  | 3  | 2  | 2  | 4  | 5  | 4  | 5  | 5  | 4  | 5  | 3  | 4  | 3  | 3   |
| 5  | 5  | 4  | 5  | 5  | 5  | 5  | 5  | 6  | 6  | 6  | 6  | 6  | 6  | 7  | 7  | 6  | 6   |
| 6  | 6  | 6  | 6  | 5  | 5  | 5  | 6  | 6  | 6  | 6  | 5  | 5  | 4  | 4  | 4  | 5  | 5   |
| 5  | 7  | 6  | 7  | 6  | 7  | 6  | 7  | 6  | 7  | 6  | 7  | 6  | 7  | 6  | 7  | 6  | 7   |
| 6  | 6  | 5  | 6  | 6  | 6  | 6  | 7  | 6  | 5  | 3  | 5  | 3  | 4  | 3  | 7  | 6  | 6   |
| 4  | 3  | 5  | 5  | 5  | 5  | 5  | 5  | 4  | 4  | 4  | 5  | 5  | 5  | 5  | 4  | 4  | 4   |
| 2  | 2  | 3  | 4  | 5  | 5  | 5  | 6  | 4  | 4  | 3  | 4  | 3  | 4  | 4  | 3  | 5  | 5   |
| 6  | 5  | 5  | 4  | 5  | 5  | 4  | 4  | 1  | 4  | 3  | 6  | 2  | 5  | 5  | 4  | 2  | 6   |
| 6  | 6  | 6  | 6  | 6  | 5  | 5  | 5  | 5  | 6  | 2  | 6  | 5  | 6  | 6  | 6  | 6  | 6   |
| 5  | 6  | 6  | 7  | 6  | 7  | 6  | 6  | 6  | 6  | 7  | 7  | 6  | 7  | 6  | 7  | 4  | 6   |
| 6  | 6  | 4  | 5  | 4  | 4  | 3  | 4  | 6  | 5  | 6  | 5  | 5  | 4  | 4  | 4  | 4  | 4   |
| 6  | 6  | 6  | 6  | 6  | 6  | 6  | 6  | 6  | 6  | 3  | 6  | 5  | 6  | 6  | 6  | 6  | 6   |
| 5  | 6  | 5  | 5  | 5  | 5  | 5  | 5  | 6  | 6  | 4  | 5  | 5  | 4  | 4  | 4  | 5  | 5   |
| 6  | 5  | 7  | 6  | 6  | 5  | 6  | 6  | 7  | 5  | 4  | 6  | 7  | 3  | 6  | 6  | 6  | 6   |
| 2  | 3  | 3  | 5  | 5  | 5  | 5  | 5  | 4  | 3  | 3  | 4  | 4  | 5  | 5  | 5  | 5  | 5   |
| 6  | 6  | 6  | 6  | 6  | 6  | 6  | 6  | 6  | 6  | 6  | 6  | 6  | 6  | 6  | 6  | 6  | 6   |
| 7  | 6  | 4  | 5  | 4  | 5  | 5  | 5  | 7  | 6  | 5  | 5  | 6  | 4  | 5  | 5  | 3  | 4   |
| 5  | 6  | 5  | 4  | 5  | 5  | 4  | 5  | 6  | 6  | 4  | 6  | 6  | 4  | 4  | 5  | 5  | 4   |
| 6  | 6  | 6  | 6  | 6  | 6  | 6  | 6  | 6  | 6  | 5  | 5  | 6  | 5  | 6  | 6  | 5  |     |
| 6  | 4  | 6  | 6  | 6  | 6  | 6  | 6  | 6  | 6  | 5  | 5  | 3  | 2  | 4  | 4  | 4  | 3   |
| 5  | 5  | 4  | 5  | 5  | 5  | 4  | 4  | 5  | 5  | 4  | 5  | 3  | 4  | 4  | 5  | 5  | 5   |
| 6  | 6  | 4  | 5  | 6  | 6  | 6  | 5  | 6  | 6  | 5  | 6  | 2  | 6  | 6  | 5  | 5  | 5   |
| 6  | 6  | 6  | 6  | 5  | 6  | 5  | 6  | 5  | 5  | 5  | 6  | 4  | 6  | 4  | 5  | 5  | 4   |
| 6  | 6  | 6  | 6  | 6  | 6  | 6  | 6  | 5  | 5  | 5  | 6  | 6  | 6  | 6  | 6  | 6  | 6   |
| 6  | 6  | 3  | 3  | 3  | 3  | 3  | 3  | 5  | 6  | 6  | 2  | 6  | 6  | 6  | 2  | 6  | 6   |
| 5  | 5  | 5  | 6  | 6  | 6  | 5  | 5  | 5  | 5  | 5  | 5  | 5  | 5  | 5  | 5  | 5  | 6   |
| 6  | 6  | 6  | 6  | 6  | 6  | 6  | 6  | 5  | 5  | 4  | 5  | 5  | 4  | 4  | 4  | 5  | 4   |
| 6  | 6  | 6  | 6  | 6  | 6  | 6  | 6  | 6  | 6  | 5  | 7  | 5  | 6  | 6  | 6  | 5  | 6   |
| 5  | 6  | 6  | 6  | 5  | 5  | 5  | 6  | 6  | 5  | 6  | 6  | 6  | 5  | 5  | 5  | 5  | 6   |
| 7  | 7  | 5  | 6  | 6  | 6  | 5  | 5  | 7  | 7  | 3  | 5  | 4  | 5  | 7  | 6  | 4  | 4   |
| 4  | 6  | 5  | 5  | 5  | 6  | 6  | 5  | 4  | 6  | 5  | 6  | 5  | 4  | 5  | 6  | 5  | 4   |
| 6  | 6  | 6  | 5  | 5  | 6  | 6  | 5  | 6  | 6  | 6  | 5  | 4  | 5  | 5  | 6  | 5  | 5   |
| 5  | 5  | 5  | 5  | 5  | 5  | 5  | 5  | 4  | 4  | 4  | 4  | 4  | 4  | 4  | 4  | 4  | 4   |
| 5  | 5  | 4  | 4  | 5  | 4  | 5  | 5  | 5  | 5  | 6  | 6  | 6  | 3  | 3  | 4  | 4  | 4   |
| 4  | 4  | 4  | 4  | 5  | 4  | 4  | 4  | 5  | 2  | 5  | 5  | 4  | 4  | 4  | 4  | 3  | 3   |
| 6  | 7  | 7  | 7  | 6  | 6  | 6  | 7  | 6  | 5  | 7  | 6  | 7  | 7  | 6  | 6  | 6  | 6   |
| 5  | 6  | 6  | 5  | 6  | 6  | 5  | 7  | 6  | 6  | 6  | 6  | 6  | 6  | 6  | 6  | 5  | 6   |
| 5  | 6  | 4  | 4  | 5  | 5  | 6  | 4  | 6  | 6  | 4  | 6  | 7  | 4  | 5  | 6  | 5  | 6   |

|   |   |   |   |   |   |   |   |   |   |   |   |   |   |   |   |   |   |
|---|---|---|---|---|---|---|---|---|---|---|---|---|---|---|---|---|---|
| 6 | 6 | 6 | 6 | 5 | 5 | 5 | 6 | 6 | 6 | 6 | 5 | 5 | 4 | 4 | 4 | 5 | 5 |
| 5 | 5 | 4 | 4 | 5 | 4 | 5 | 5 | 4 | 4 | 4 | 5 | 5 | 5 | 5 | 4 | 4 | 4 |
| 7 | 7 | 7 | 7 | 7 | 7 | 7 | 7 | 7 | 7 | 7 | 7 | 7 | 7 | 7 | 7 | 7 | 7 |
| 4 | 4 | 4 | 4 | 4 | 4 | 4 | 4 | 4 | 4 | 4 | 4 | 4 | 4 | 4 | 4 | 4 | 4 |
| 6 | 6 | 6 | 6 | 6 | 6 | 6 | 6 | 6 | 5 | 4 | 6 | 4 | 4 | 5 | 5 | 5 | 5 |
| 4 | 5 | 5 | 5 | 5 | 5 | 6 | 6 | 5 | 6 | 6 | 6 | 5 | 5 | 5 | 5 | 5 | 5 |
| 7 | 7 | 5 | 6 | 6 | 6 | 6 | 6 | 7 | 7 | 3 | 6 | 2 | 5 | 6 | 6 | 6 | 6 |
| 6 | 6 | 4 | 5 | 6 | 6 | 6 | 5 | 6 | 6 | 5 | 6 | 2 | 6 | 6 | 5 | 5 | 5 |
| 6 | 5 | 2 | 4 | 6 | 6 | 6 | 6 | 7 | 7 | 5 | 5 | 5 | 3 | 6 | 6 | 4 | 5 |
| 6 | 6 | 5 | 6 | 6 | 6 | 6 | 6 | 6 | 6 | 6 | 6 | 6 | 6 | 6 | 6 | 6 | 6 |
| 5 | 5 | 2 | 4 | 4 | 2 | 3 | 4 | 6 | 5 | 5 | 4 | 4 | 2 | 5 | 4 | 4 | 4 |
| 5 | 5 | 5 | 5 | 5 | 5 | 5 | 5 | 5 | 5 | 5 | 5 | 5 | 5 | 5 | 5 | 5 | 5 |
| 6 | 5 | 5 | 6 | 6 | 6 | 6 | 5 | 6 | 6 | 2 | 6 | 4 | 6 | 4 | 5 | 4 | 4 |
| 6 | 6 | 6 | 6 | 6 | 6 |   | 5 | 6 | 5 | 3 | 7 | 4 |   | 7 | 5 | 5 | 6 |
| 6 | 6 | 5 | 5 | 5 | 5 | 4 | 4 | 4 | 5 | 5 | 5 | 5 | 4 | 4 | 3 | 4 | 5 |
| 2 | 3 | 3 | 5 | 5 | 5 | 5 | 5 | 4 | 3 | 3 | 4 | 4 | 5 | 5 | 5 | 5 | 5 |
| 6 | 6 | 5 | 5 | 5 | 5 | 4 | 4 | 3 | 5 | 5 | 5 | 5 | 4 | 4 | 3 | 4 | 5 |
| 6 | 5 | 5 | 6 | 7 | 7 | 6 | 6 | 6 | 5 | 5 | 6 | 5 | 6 | 5 | 5 | 4 | 6 |
| 4 | 4 | 4 | 4 | 5 | 4 | 4 | 4 | 5 | 2 | 5 | 5 | 4 | 4 | 4 | 4 | 3 | 3 |
| 5 | 6 | 5 | 5 | 5 | 5 | 5 | 5 | 6 | 6 | 2 | 5 | 5 | 3 | 5 | 6 | 5 | 5 |
| 6 | 6 | 6 | 6 | 6 | 6 | 6 | 6 | 6 | 6 | 6 | 5 | 4 | 5 | 5 | 5 | 4 | 5 |
| 7 | 6 | 6 | 6 | 6 | 6 | 7 | 7 | 6 | 6 | 4 | 6 | 6 | 5 | 6 | 6 | 2 | 2 |
| 6 | 6 | 5 | 5 | 6 | 5 | 6 | 6 | 5 | 6 | 4 | 7 | 3 | 6 | 6 | 6 | 4 | 6 |
| 7 | 7 | 7 | 7 | 7 | 7 | 7 | 7 | 7 | 7 | 7 | 7 | 7 | 7 | 7 | 7 | 7 | 7 |
| 5 | 4 | 3 | 5 | 6 | 6 | 4 | 5 | 5 | 5 | 6 | 7 | 6 | 3 | 3 | 3 | 4 | 4 |
| 5 | 5 | 5 | 4 | 5 | 5 | 5 | 5 | 6 | 4 | 4 | 5 | 4 | 3 | 3 | 4 | 4 | 4 |
| 6 | 6 | 6 | 6 | 5 | 5 | 5 | 5 | 5 | 5 | 3 | 6 | 6 | 5 | 5 | 5 | 5 | 6 |
| 6 | 6 | 5 | 6 | 7 | 7 | 6 | 6 | 6 | 4 | 5 | 7 | 6 | 4 | 5 | 6 | 5 | 5 |
| 6 | 5 | 7 | 7 | 7 | 7 | 7 | 7 | 7 | 7 | 2 | 7 | 7 | 7 | 7 | 7 | 7 | 7 |
| 5 | 4 | 5 | 4 | 5 | 4 | 5 | 4 | 5 | 6 | 5 | 6 | 5 | 6 | 5 | 6 | 5 | 6 |
| 7 | 7 | 6 | 7 | 7 | 6 | 5 | 6 | 7 | 6 | 2 | 7 | 7 | 6 | 6 | 5 | 4 | 6 |
| 6 | 6 | 5 | 6 | 6 | 6 | 6 | 6 | 6 | 4 | 4 | 7 | 6 | 2 | 2 | 4 | 6 | 6 |
| 6 | 6 | 6 | 4 | 5 | 4 | 6 | 6 | 6 | 6 | 4 | 5 | 6 | 5 | 6 | 4 | 5 | 5 |
| 7 | 6 | 4 | 5 | 4 | 5 | 5 | 5 | 7 | 6 | 5 | 5 | 6 | 4 | 5 | 5 | 3 | 4 |
| 6 | 6 | 6 | 6 | 6 | 6 | 6 | 6 | 6 | 6 | 2 | 6 | 6 | 6 | 6 | 7 | 6 | 6 |
| 5 | 5 | 4 | 5 | 5 | 4 | 5 | 5 | 6 | 6 | 6 | 6 | 5 | 4 | 5 | 4 | 3 | 5 |
| 6 | 6 | 4 | 5 | 6 | 5 | 5 | 5 | 6 | 6 | 6 | 6 | 6 | 4 | 4 | 6 | 6 | 6 |
| 6 | 6 | 6 | 6 | 5 | 5 | 5 | 6 | 6 | 6 | 6 | 5 | 5 | 4 | 4 | 4 | 5 | 5 |
| 6 | 5 | 5 | 4 | 4 | 5 | 5 | 5 | 6 | 6 | 4 | 5 | 5 | 6 | 3 | 3 | 5 | 4 |
| 6 | 5 | 6 | 6 | 6 | 6 | 6 | 6 | 6 | 6 | 6 | 6 | 5 | 4 | 4 | 4 | 5 | 5 |

|   |   |   |   |   |   |   |   |   |   |   |   |   |   |   |   |   |   |
|---|---|---|---|---|---|---|---|---|---|---|---|---|---|---|---|---|---|
| 5 | 5 | 5 | 5 | 5 | 5 | 4 | 5 | 5 | 6 | 5 | 6 | 6 | 3 | 3 | 3 | 3 | 4 |
| 5 | 5 | 5 | 5 | 5 | 5 | 5 | 6 | 5 | 4 | 2 | 5 |   | 5 | 5 | 5 | 5 | 5 |
| 3 | 3 | 4 | 4 | 5 | 5 | 4 | 4 | 5 | 5 | 4 | 4 | 3 | 3 | 4 | 4 | 5 | 4 |
| 6 | 6 | 6 | 5 | 5 | 5 | 5 | 5 | 5 | 5 | 5 | 6 | 6 | 6 | 6 | 6 | 6 | 6 |
| 6 | 6 | 4 | 4 | 5 | 4 | 3 | 3 | 5 | 2 | 4 | 4 | 2 | 2 | 2 | 4 | 5 | 4 |
| 6 | 6 | 6 | 6 | 7 | 6 | 7 | 6 | 5 | 6 | 3 | 6 | 3 | 5 | 6 | 6 | 4 | 6 |
| 6 |   | 4 | 6 | 4 | 4 | 5 | 5 | 4 | 4 | 4 | 4 | 4 | 4 | 4 | 4 | 4 | 4 |
| 6 | 5 | 5 | 4 | 4 | 4 | 3 | 3 | 4 | 4 | 6 | 5 | 2 | 2 | 2 | 2 | 2 | 2 |
| 6 | 6 | 6 | 6 | 5 | 5 | 5 | 6 | 6 | 6 | 6 | 5 | 5 | 4 | 4 | 4 | 5 | 5 |
| 5 | 6 | 2 | 4 | 6 | 5 | 4 | 5 | 5 | 5 | 4 | 4 | 5 | 5 | 5 | 2 | 2 | 2 |
| 4 | 5 | 5 | 6 | 6 | 6 | 5 | 5 | 5 | 5 | 6 | 6 | 6 | 6 | 6 | 6 | 5 | 6 |
| 6 | 6 | 6 | 6 | 5 | 5 | 5 | 6 | 6 | 6 | 6 | 5 | 5 | 4 | 4 | 4 | 5 | 5 |
| 5 | 5 | 3 | 5 | 4 | 4 | 4 | 4 | 6 | 4 | 5 | 5 | 5 | 4 | 5 | 5 | 5 | 6 |
| 6 | 6 | 6 | 6 | 7 | 7 | 6 | 6 | 5 | 5 | 6 | 6 | 6 | 6 | 6 | 7 | 5 | 5 |
| 5 | 5 | 5 | 5 | 5 | 5 | 4 | 4 | 5 | 5 | 5 | 5 | 5 | 3 | 2 | 2 | 3 | 5 |
| 5 | 4 | 4 | 5 | 4 | 5 | 6 | 4 | 5 | 4 | 7 | 4 | 6 | 4 | 3 | 6 | 4 | 5 |
| 4 | 5 | 5 | 5 | 5 | 6 | 4 | 4 | 4 | 5 | 5 | 4 | 6 | 6 | 5 | 5 | 5 | 6 |
| 6 | 6 | 6 | 6 | 6 | 6 |   | 5 | 6 | 5 | 3 | 7 | 4 |   | 7 | 5 | 5 | 6 |
| 6 | 6 | 6 | 6 | 6 | 6 | 6 | 6 | 6 | 6 | 4 | 6 | 4 | 6 | 5 | 6 | 6 | 6 |
| 4 | 4 | 3 | 5 | 6 | 6 | 5 | 5 | 4 | 4 | 4 | 5 | 4 | 2 | 2 | 3 | 4 | 5 |
| 6 | 7 | 7 | 7 | 7 | 7 | 7 | 7 | 6 | 6 | 6 | 6 | 7 | 6 | 6 | 6 | 7 | 7 |
| 3 | 5 | 4 | 4 | 5 | 3 | 4 | 4 | 5 | 5 | 4 | 5 | 4 | 3 | 5 | 3 | 4 | 5 |
| 4 | 4 | 6 | 5 | 5 | 3 | 3 | 5 | 6 | 6 | 4 | 5 | 6 | 3 | 3 | 3 | 3 | 4 |
| 5 | 5 | 5 | 6 | 7 | 6 | 6 | 5 | 6 | 5 | 3 | 6 | 3 | 5 | 6 | 5 | 5 | 7 |
| 5 | 5 | 5 | 4 | 4 | 4 | 4 | 4 | 5 | 5 | 5 | 5 | 5 | 4 | 5 | 5 | 5 | 5 |
| 3 | 3 | 3 | 3 | 3 | 3 | 3 | 3 | 3 | 3 | 3 | 3 | 3 | 3 | 3 | 3 | 3 | 3 |
| 5 | 5 | 4 | 5 | 5 | 4 | 3 | 4 | 6 | 6 | 3 | 6 | 4 | 5 | 5 | 5 | 4 | 3 |
| 5 | 5 | 5 | 6 | 6 | 6 | 5 | 5 | 6 | 5 | 4 | 6 | 6 | 4 | 4 | 5 | 5 | 4 |
| 5 | 6 | 6 | 6 | 5 | 5 | 5 | 6 | 6 | 5 | 6 | 6 | 6 | 5 | 5 | 5 | 5 | 6 |
| 6 | 6 | 6 | 6 | 6 | 6 | 6 | 6 | 6 | 6 | 5 | 6 | 6 | 4 | 5 | 6 | 6 | 4 |
| 6 | 6 | 6 | 6 | 7 | 6 | 7 | 6 | 5 | 6 | 3 | 6 | 3 | 5 | 6 | 6 | 4 | 6 |
| 5 | 5 | 5 | 5 | 5 | 5 | 5 | 5 | 5 | 5 | 5 | 5 | 5 | 5 | 5 | 5 | 5 | 5 |
| 5 | 5 | 6 | 6 | 6 | 6 | 6 | 6 | 5 | 6 | 6 | 5 | 5 | 5 | 6 | 5 | 5 | 5 |
| 5 | 5 | 5 | 5 | 5 | 5 | 5 | 5 | 4 | 4 | 4 | 4 | 4 | 4 | 4 | 4 | 4 | 4 |
| 6 | 6 | 3 | 6 | 6 | 6 | 6 |   | 7 | 7 |   | 5 | 6 | 3 | 3 | 7 |   | 4 |
| 5 | 6 | 4 | 5 | 5 | 5 | 5 | 5 | 6 | 5 | 3 | 5 | 5 | 5 | 5 | 5 | 5 | 5 |
| 6 | 6 | 3 | 6 | 6 | 6 | 6 |   | 7 | 7 |   | 5 | 6 | 3 | 3 | 7 |   | 4 |
| 5 | 5 | 5 | 5 | 5 | 5 | 4 | 4 | 5 | 4 | 5 | 5 | 5 | 2 | 5 | 4 | 5 | 4 |
| 6 | 7 | 4 | 7 | 7 | 6 | 7 | 4 | 6 | 2 | 2 | 5 | 6 | 6 | 2 | 7 | 5 | 6 |
| 6 | 6 | 6 | 4 | 7 | 5 | 5 | 4 | 7 |   | 3 | 7 | 4 | 6 | 6 | 6 | 6 | 4 |

|   |   |   |   |   |   |   |   |   |   |   |   |   |   |   |   |   |   |
|---|---|---|---|---|---|---|---|---|---|---|---|---|---|---|---|---|---|
| 5 | 6 | 5 | 6 | 7 | 6 | 6 | 6 | 7 | 6 | 4 | 6 | 3 | 7 | 6 | 6 | 5 | 7 |
| 7 | 6 | 4 | 5 | 4 | 5 | 5 | 5 | 7 | 6 | 5 | 5 | 6 | 4 | 5 | 5 | 3 | 4 |
| 5 | 6 | 5 | 5 | 5 | 5 | 5 | 5 | 6 | 6 | 2 | 5 | 5 | 3 | 5 | 6 | 5 | 5 |
| 6 | 6 | 6 | 6 | 6 | 6 | 6 | 6 | 6 | 6 | 6 | 6 | 6 | 4 | 6 | 6 | 4 | 4 |
| 5 | 5 | 4 | 4 | 4 | 4 | 4 | 4 | 5 | 4 | 3 | 5 | 3 |   | 5 | 4 | 4 | 5 |
| 5 | 5 | 5 | 5 | 4 | 4 | 5 | 5 | 5 | 4 | 4 | 4 | 4 | 3 | 4 | 4 | 4 | 4 |
| 5 | 6 | 5 | 5 | 6 | 5 | 4 | 5 | 4 | 4 | 4 | 5 | 4 | 5 | 5 | 4 | 5 | 4 |
| 6 | 2 | 6 | 5 | 5 | 5 | 4 | 4 | 4 | 6 | 5 | 6 | 4 | 4 | 4 | 4 | 4 | 6 |
| 7 | 7 | 7 | 7 | 7 | 7 | 7 | 7 | 7 | 4 | 6 | 7 | 2 | 6 | 7 | 7 | 6 | 7 |
| 5 | 6 | 5 | 6 | 6 | 5 | 4 | 4 | 4 | 5 | 3 | 5 | 3 | 6 | 4 | 4 | 2 | 6 |
| 6 | 6 | 6 | 6 | 6 | 6 | 6 | 6 | 5 | 4 | 6 | 6 | 5 | 4 | 4 | 4 | 4 | 4 |
| 5 | 5 | 5 | 6 | 6 | 6 | 6 | 5 | 6 | 5 | 3 | 6 | 3 | 5 | 6 | 6 | 5 | 7 |
| 5 | 4 | 5 | 4 | 4 | 3 | 3 | 5 | 4 | 5 | 5 | 5 | 4 | 3 | 5 | 4 | 5 | 5 |
| 5 | 5 | 4 | 5 | 5 | 5 | 5 | 4 | 4 | 5 | 4 | 5 | 4 | 3 | 3 | 3 | 3 | 3 |
| 6 | 6 | 4 | 5 | 6 | 6 | 5 | 6 | 6 | 6 | 5 | 5 | 5 | 4 | 5 | 5 | 5 | 5 |
| 5 | 4 | 4 | 4 | 4 | 5 | 5 | 5 | 5 | 3 | 4 | 4 | 4 | 3 | 3 | 3 | 3 | 3 |
| 6 | 6 | 6 | 5 | 4 | 4 | 6 | 6 | 6 | 6 | 6 | 6 | 6 | 3 | 3 | 4 | 3 | 3 |
| 6 | 6 | 4 | 5 | 5 | 5 | 5 | 5 | 4 | 6 | 6 | 5 | 6 | 5 | 5 | 4 | 5 | 5 |
| 7 | 6 | 5 | 6 | 6 | 6 | 6 | 5 | 5 | 3 | 4 | 6 | 3 | 7 | 7 | 6 | 7 | 6 |
| 6 | 4 | 4 | 4 | 5 | 5 | 4 | 4 | 5 | 4 | 5 | 5 | 6 | 4 | 4 | 4 | 4 | 5 |
| 6 | 6 | 4 | 5 | 6 | 6 | 5 | 6 | 5 | 5 | 5 | 5 | 5 | 4 | 5 | 5 | 5 | 5 |
| 3 | 5 | 5 | 4 | 5 | 3 | 4 | 3 | 5 | 5 | 5 | 4 | 5 | 5 | 5 | 5 | 5 | 5 |
| 5 | 6 | 3 | 5 | 5 | 6 | 5 | 5 | 6 | 7 | 5 | 6 | 7 | 4 | 5 | 5 | 5 | 5 |
| 6 | 6 | 6 | 6 | 6 | 6 | 6 | 6 | 6 | 5 | 4 | 6 | 4 | 4 | 6 | 6 | 6 | 6 |
| 5 | 6 | 3 | 5 | 5 | 5 | 5 | 5 | 6 | 5 | 5 | 5 | 5 | 6 | 5 | 4 | 6 | 6 |
| 3 | 6 | 4 | 5 | 5 | 5 | 5 | 5 | 5 | 4 | 3 | 6 | 3 | 3 | 3 | 4 | 4 | 5 |
| 6 | 6 | 6 | 6 | 6 | 6 | 6 | 6 | 6 | 6 | 5 | 6 | 6 | 6 | 6 | 3 | 4 | 5 |
| 5 | 5 | 5 | 5 | 5 | 5 | 5 | 5 | 5 | 5 | 5 | 5 | 5 | 5 | 5 | 5 | 5 | 5 |
| 6 | 6 | 6 | 7 | 6 | 6 | 6 | 7 | 6 | 7 | 5 | 7 | 6 | 4 | 5 | 5 | 6 | 6 |
| 6 | 6 | 6 | 6 | 6 | 6 | 6 | 6 | 6 | 4 | 4 | 6 | 6 | 5 | 5 | 5 | 5 | 5 |
| 6 | 6 | 4 | 5 | 5 | 5 | 5 | 5 | 6 | 5 | 5 | 5 | 5 | 7 | 7 | 7 | 5 | 6 |
| 5 | 5 | 5 | 5 | 5 | 5 | 6 | 6 | 6 | 6 | 5 | 5 | 5 | 2 | 5 | 5 | 5 | 5 |
| 5 | 6 | 6 | 6 | 6 | 6 | 6 | 6 | 6 | 6 | 6 | 6 | 6 | 6 | 6 | 6 | 6 | 6 |
| 5 | 6 | 4 | 6 | 6 | 6 | 6 | 6 | 6 | 6 | 6 | 6 | 6 | 6 | 6 | 6 | 6 | 6 |
| 6 | 6 | 6 | 6 | 6 | 6 | 6 | 6 | 6 | 4 | 4 | 6 | 6 | 5 | 5 | 5 | 5 | 5 |
| 6 | 2 | 6 | 5 | 5 | 5 | 4 | 4 | 4 | 6 | 5 | 6 | 4 | 4 | 4 | 4 | 4 | 6 |
| 4 | 4 | 4 | 4 | 4 | 5 | 5 | 4 | 4 | 4 | 3 | 5 | 3 | 4 | 4 | 5 | 3 | 4 |
| 6 | 6 | 6 | 6 | 6 | 5 | 6 | 6 | 6 | 6 | 6 | 6 | 6 | 6 | 6 | 6 | 6 | 6 |
| 5 | 5 | 4 | 5 | 5 | 4 | 4 | 5 | 6 | 4 | 4 | 6 | 6 | 4 | 3 | 3 | 5 | 6 |
| 5 | 5 | 5 | 4 | 5 | 4 | 3 | 3 | 6 | 6 | 3 | 5 | 5 | 3 | 6 | 4 | 5 | 5 |

|   |   |   |   |   |   |   |   |   |   |   |   |   |   |   |   |   |   |
|---|---|---|---|---|---|---|---|---|---|---|---|---|---|---|---|---|---|
| 7 | 6 | 6 | 5 | 6 | 6 | 5 | 4 | 7 | 6 | 6 | 7 | 5 | 6 | 6 | 5 | 6 | 6 |
| 5 | 5 | 5 | 5 | 5 | 5 | 6 | 5 | 6 | 6 | 5 | 5 | 4 | 4 | 4 | 5 | 5 | 4 |
| 6 | 5 | 6 | 6 | 6 | 6 | 6 | 6 | 6 | 6 | 2 | 6 | 2 | 6 | 6 | 5 | 6 | 5 |
| 6 | 6 | 3 | 6 | 6 | 6 | 6 |   | 7 | 7 |   | 5 | 6 | 3 | 3 | 7 |   | 4 |
| 6 | 6 | 6 | 6 | 5 | 5 | 6 | 7 | 5 | 6 | 5 | 6 | 5 | 6 | 6 | 5 | 5 | 5 |
| 5 | 5 | 4 | 5 | 5 | 5 | 6 | 4 | 7 | 4 | 5 | 4 | 6 | 5 | 3 | 5 | 3 | 5 |
| 7 | 7 | 7 | 7 | 7 | 7 | 7 | 7 | 7 | 7 | 7 | 7 | 7 | 7 | 7 | 7 | 7 | 7 |
| 6 | 6 | 4 | 6 | 4 | 4 | 5 | 5 | 4 | 4 | 4 | 4 | 4 | 4 | 4 | 4 | 4 | 4 |
| 6 | 6 | 6 | 6 | 7 | 4 | 5 | 6 | 7 | 6 | 2 | 7 | 3 | 6 | 6 | 7 | 6 | 6 |
| 4 | 4 | 4 | 4 | 4 | 5 | 5 | 4 | 4 | 4 | 3 | 5 | 3 | 4 | 4 | 5 | 3 | 4 |
| 5 | 5 | 4 | 5 | 5 | 5 | 5 | 5 | 5 | 5 | 5 | 5 | 5 | 4 | 5 | 4 | 5 | 5 |
| 7 | 3 | 5 | 6 | 4 | 6 | 5 | 5 | 4 | 6 | 6 | 7 | 5 | 3 | 4 | 4 | 6 | 7 |
| 7 | 7 | 6 | 7 | 7 | 7 | 6 | 6 | 6 | 6 | 6 | 7 | 5 | 6 | 6 | 4 | 6 | 4 |
| 6 | 6 | 6 | 6 | 6 | 6 | 6 | 6 | 6 | 5 | 4 | 6 | 4 | 4 | 6 | 6 | 6 | 6 |
| 5 | 5 | 4 | 5 | 5 | 4 | 3 | 4 | 6 | 6 | 3 | 6 | 4 | 5 | 5 | 5 | 4 | 3 |
| 5 | 5 | 5 | 5 | 5 | 5 | 5 | 5 | 5 | 5 | 5 | 5 | 5 | 5 | 5 | 5 | 6 | 6 |
| 5 | 5 | 5 | 6 | 6 | 4 | 4 | 5 | 5 | 5 | 5 | 5 | 4 | 5 | 5 | 5 | 5 | 5 |
| 6 | 6 | 6 | 6 | 6 | 6 | 6 | 6 | 7 | 6 | 2 | 6 | 3 | 6 | 6 | 6 | 6 | 6 |
| 7 | 6 | 6 | 7 | 7 | 7 | 7 | 7 | 5 | 6 | 2 | 6 | 5 | 5 | 5 | 5 | 6 | 6 |
| 7 | 7 | 7 | 7 | 7 | 7 | 7 | 7 | 7 | 3 | 3 | 7 | 7 | 7 | 7 | 7 | 7 | 7 |
| 6 | 6 | 6 | 6 | 6 | 6 | 6 | 6 | 6 | 4 | 4 | 6 | 6 | 5 | 5 | 5 | 5 | 5 |
| 6 | 6 | 6 | 6 | 6 | 6 | 6 | 6 | 6 | 6 | 4 | 6 | 4 | 6 | 5 | 6 | 6 | 6 |
| 6 | 7 | 4 | 7 | 7 | 6 | 7 | 4 | 6 | 2 | 2 | 5 | 6 | 6 | 2 | 7 | 5 | 6 |
| 3 | 4 | 4 | 5 | 6 | 6 | 7 | 6 | 6 | 4 | 5 | 6 | 5 | 4 | 5 | 4 | 4 | 6 |
| 5 | 5 | 4 | 5 | 5 | 5 | 4 | 4 | 4 | 4 | 5 | 4 | 4 | 4 | 4 | 4 | 3 | 3 |
| 6 | 6 | 6 | 5 | 5 | 5 | 5 | 5 | 6 | 6 | 6 | 5 | 5 | 3 | 6 | 4 | 6 | 6 |
| 6 | 6 | 6 | 6 | 6 | 5 | 5 | 6 | 6 | 6 | 3 | 5 | 3 | 5 | 5 | 5 | 6 | 5 |
| 6 | 6 | 6 | 6 | 6 | 6 | 6 | 6 | 6 | 6 | 6 | 6 | 6 | 6 | 6 | 6 | 6 | 6 |
| 5 | 4 | 5 | 5 | 4 | 5 | 4 | 5 | 5 | 5 | 5 | 4 | 4 | 4 | 4 | 5 | 4 | 4 |
| 3 | 4 | 3 | 3 | 6 | 6 | 4 | 3 | 3 | 4 | 2 | 6 | 2 | 4 | 4 | 3 | 2 | 6 |
| 5 | 6 | 5 | 5 | 5 | 5 | 5 | 5 | 6 | 6 | 2 | 5 | 5 | 3 | 5 | 6 | 5 | 5 |
| 5 | 5 | 5 | 5 | 5 | 5 | 4 | 4 | 5 | 4 | 5 | 5 | 4 | 3 | 4 | 5 | 4 | 4 |
| 6 | 6 | 5 | 6 | 6 | 5 | 6 | 6 | 5 | 5 | 4 | 5 | 6 | 6 | 6 | 6 | 6 | 6 |
| 5 | 5 | 5 | 4 | 4 | 4 | 5 | 5 | 5 | 5 | 5 | 5 | 5 | 5 | 5 | 5 | 5 | 6 |
| 6 | 6 | 5 | 6 | 7 | 6 | 6 | 6 | 7 | 6 | 4 | 7 | 3 | 6 | 7 | 6 | 7 | 7 |
| 6 | 6 | 6 | 6 | 6 | 6 | 7 | 7 | 5 | 5 | 5 | 6 | 6 | 1 | 1 | 1 | 1 | 1 |
| 6 | 6 | 5 | 6 | 6 | 6 | 5 | 4 | 4 | 4 | 4 | 5 | 5 | 4 | 4 | 4 | 4 | 4 |
| 6 | 6 | 3 | 6 | 6 | 6 | 6 |   | 7 | 7 |   | 5 | 6 | 3 | 3 | 7 |   | 4 |
| 3 | 4 | 5 | 4 | 3 | 4 | 4 | 4 | 4 | 5 | 4 | 5 | 4 | 5 | 4 | 5 | 6 | 5 |
| 5 | 6 | 3 | 5 | 5 | 4 | 4 | 4 | 5 | 5 | 6 | 4 | 6 | 5 | 4 | 5 | 5 | 5 |

|   |   |   |   |   |   |   |   |   |   |   |   |   |   |   |   |   |   |
|---|---|---|---|---|---|---|---|---|---|---|---|---|---|---|---|---|---|
| 5 | 5 | 5 | 6 | 6 | 6 | 6 | 6 | 4 | 4 | 4 | 4 | 4 | 4 | 4 | 4 | 4 | 4 |
| 5 | 5 | 4 | 5 | 5 | 5 | 5 | 5 | 5 | 5 | 5 | 5 | 5 | 4 | 5 | 4 | 5 | 5 |
| 5 | 5 | 5 | 6 | 6 | 4 | 4 | 5 | 5 | 4 | 4 | 5 | 4 | 4 | 4 | 4 | 4 | 5 |
| 5 | 5 | 6 | 6 | 6 | 6 | 6 | 6 | 6 | 6 | 6 | 6 | 6 | 6 | 6 | 6 | 6 | 6 |
| 6 | 6 | 4 | 5 | 5 | 5 | 5 | 5 | 6 | 5 | 3 | 5 | 3 | 5 | 2 | 3 | 5 | 5 |
| 6 | 6 | 6 | 6 | 6 | 6 | 6 | 6 | 5 | 5 | 6 | 6 | 6 | 6 | 6 | 6 | 6 | 6 |
| 5 | 5 | 6 | 5 | 6 | 5 | 6 | 5 | 5 | 6 | 5 | 6 | 4 | 5 | 5 | 5 | 5 | 6 |
| 7 | 7 | 7 | 6 | 6 | 6 | 5 | 6 | 7 | 6 | 5 | 6 | 5 | 6 | 6 | 6 | 6 | 5 |
| 6 | 6 | 6 | 6 | 6 | 6 | 6 | 6 | 6 | 6 | 6 | 6 | 6 | 6 | 6 | 6 | 6 | 6 |
| 4 | 4 | 4 | 5 | 5 | 5 | 6 | 6 | 4 | 4 | 4 | 5 | 3 | 5 | 3 | 5 | 5 | 5 |
| 5 | 5 | 4 | 5 | 5 | 5 | 5 | 5 | 5 | 5 | 5 | 5 | 5 | 4 | 5 | 4 | 5 | 5 |
| 6 | 6 | 6 | 6 | 6 | 6 | 6 | 6 | 5 | 5 | 5 | 5 | 5 | 5 | 5 | 5 | 5 | 5 |
| 5 | 5 | 5 | 5 | 5 | 5 | 4 | 4 | 6 | 6 | 6 | 5 | 4 | 5 | 5 | 5 | 5 | 5 |
| 5 | 5 | 2 | 5 | 4 | 4 | 4 | 4 | 6 | 6 | 4 | 5 | 5 | 3 | 4 | 4 | 5 | 5 |
| 5 | 6 | 4 | 5 | 5 | 5 | 5 | 5 | 6 | 5 | 3 | 5 | 5 | 5 | 5 | 5 | 5 | 5 |
| 6 | 6 | 6 | 6 | 6 | 6 | 6 | 6 | 6 | 6 | 6 | 6 | 6 | 6 | 6 | 6 | 6 | 6 |
| 2 | 4 | 4 | 5 | 5 | 5 | 5 | 5 | 5 | 2 | 3 | 5 | 3 | 3 | 5 | 5 | 2 | 5 |
| 7 | 6 | 6 | 6 | 6 | 6 | 6 | 6 | 7 | 7 | 6 | 7 | 6 | 2 | 6 | 6 | 6 | 6 |
| 6 | 6 | 6 | 6 | 7 | 4 | 5 | 6 | 7 | 6 | 2 | 7 | 3 | 6 | 6 | 7 | 6 | 6 |
| 5 | 5 | 4 | 5 | 5 | 4 | 3 | 4 | 6 | 6 | 3 | 6 | 4 | 5 | 5 | 5 | 4 | 3 |
| 5 | 5 | 4 | 5 | 5 | 5 | 4 | 4 | 5 | 5 | 4 | 5 | 5 | 6 | 5 | 6 | 5 | 5 |
| 5 | 4 | 4 | 5 | 5 | 4 | 5 | 4 | 4 | 4 | 5 | 4 | 5 | 4 | 5 | 4 | 4 | 5 |
| 5 | 5 | 5 | 4 | 5 | 4 | 3 | 3 | 6 | 6 | 3 | 5 | 5 | 3 | 6 | 4 | 5 | 5 |
| 6 | 5 | 5 | 5 | 5 | 5 | 4 | 4 | 6 | 6 | 5 | 4 | 5 | 4 | 5 | 5 | 5 | 5 |
| 2 | 2 | 2 | 2 | 2 | 2 | 2 | 2 | 3 | 3 | 4 | 4 | 4 | 3 | 3 | 3 | 3 | 3 |
| 4 | 4 | 4 | 5 | 5 | 5 | 4 | 4 | 4 | 4 | 4 | 5 | 5 | 3 | 3 | 3 | 3 | 3 |
| 5 | 6 | 3 | 4 |   | 5 | 5 | 6 | 6 | 6 | 6 | 5 | 6 | 5 | 5 | 5 | 5 | 6 |
| 6 | 6 | 5 | 6 | 6 | 6 | 5 | 5 | 5 | 5 | 3 | 6 | 5 | 5 | 5 | 6 | 6 | 5 |
| 6 | 5 | 2 | 6 | 5 | 5 | 5 | 7 | 7 | 2 | 3 | 3 | 3 | 7 | 4 | 4 | 1 | 1 |
| 6 | 6 | 5 | 6 | 6 | 6 | 4 | 6 | 6 | 7 | 4 | 4 | 4 | 5 | 4 | 4 | 6 | 6 |
| 5 | 5 | 6 | 6 | 6 | 5 | 5 | 6 | 6 | 5 | 5 | 6 | 5 | 5 | 6 | 6 | 5 | 6 |
| 5 | 5 | 5 | 4 | 4 | 4 | 4 | 4 | 5 | 5 | 5 | 5 | 5 | 4 | 5 | 5 | 5 | 4 |
| 7 | 7 | 6 | 6 | 6 | 6 | 6 | 6 | 7 | 7 | 7 | 7 | 7 | 7 | 7 | 7 | 7 | 7 |
| 6 | 6 | 6 | 6 | 6 | 6 | 6 | 6 | 6 | 6 | 6 | 6 | 6 | 6 | 6 | 6 | 6 | 6 |
| 5 | 5 | 4 | 5 | 5 | 5 | 6 | 4 | 7 | 4 | 5 | 4 | 6 | 5 | 3 | 5 | 3 | 5 |
| 6 | 6 | 6 | 6 | 6 | 6 | 5 | 6 | 5 | 5 | 4 | 5 | 6 | 5 | 5 | 5 | 5 | 5 |
| 3 | 3 | 3 | 5 | 6 | 5 | 6 | 6 | 5 | 5 | 3 | 5 | 4 | 4 | 6 | 6 | 4 | 5 |
| 6 | 6 | 6 | 6 | 6 | 6 | 5 | 5 | 6 | 6 | 6 | 7 | 7 | 6 | 6 | 5 | 6 | 5 |
| 2 | 5 | 4 | 5 | 5 | 5 | 4 | 4 | 6 | 6 | 6 | 7 | 5 | 1 | 2 | 3 | 4 | 4 |
| 6 | 6 | 5 | 5 | 5 | 5 | 5 | 6 | 5 | 5 | 4 | 6 | 6 | 6 | 6 | 5 | 5 | 5 |

|   |   |   |   |   |   |   |   |   |   |   |   |   |   |   |   |   |   |
|---|---|---|---|---|---|---|---|---|---|---|---|---|---|---|---|---|---|
| 6 | 6 | 6 | 7 | 7 | 7 | 7 | 6 | 7 | 7 | 6 | 7 | 7 | 7 | 6 | 6 | 6 | 6 |
| 4 | 4 | 4 | 5 | 5 | 5 | 5 | 5 | 5 | 5 | 4 | 5 | 6 | 3 | 3 | 4 | 4 | 4 |
| 6 |   | 4 | 6 | 4 | 4 | 5 | 5 | 4 | 4 | 4 | 4 | 4 | 4 | 4 | 4 | 4 | 4 |
| 5 | 5 | 5 | 6 | 6 | 6 | 7 | 7 | 6 | 6 | 6 | 6 | 6 | 6 | 6 | 5 | 5 | 6 |
| 6 | 6 | 6 | 5 | 5 | 5 | 5 | 5 | 5 | 4 | 5 | 5 | 5 | 4 | 4 | 4 | 4 | 5 |
| 6 | 6 | 6 | 6 | 6 | 5 | 5 | 5 | 6 | 6 | 7 | 6 | 3 | 7 | 7 | 7 | 7 | 7 |
| 6 | 6 | 6 | 7 | 7 | 7 | 7 | 6 | 7 | 7 | 6 | 7 | 7 | 7 | 6 | 6 | 6 | 6 |
| 6 | 6 | 6 | 6 | 5 | 5 | 6 | 5 | 5 | 6 | 4 | 6 | 5 | 4 | 4 | 5 | 5 | 5 |
| 3 | 4 | 3 | 4 | 5 | 5 | 5 | 5 | 5 | 5 | 5 | 6 | 6 | 2 | 2 | 4 | 4 | 4 |
| 6 | 6 | 4 | 5 | 6 | 6 | 5 | 6 | 6 | 6 | 5 | 5 | 5 | 4 | 5 | 5 | 5 | 5 |
| 6 | 3 | 5 | 4 | 4 | 5 | 5 | 5 | 6 | 6 | 4 | 5 | 5 | 6 | 3 | 3 | 5 | 4 |
| 6 | 6 | 6 | 6 | 6 | 3 | 6 | 5 | 6 | 5 | 4 | 6 | 6 | 3 | 5 | 5 | 3 | 6 |
| 7 | 7 | 7 | 7 | 7 | 7 | 7 | 7 | 6 | 6 | 6 | 6 | 6 | 6 | 6 | 6 | 6 | 6 |
| 5 | 5 | 4 | 5 | 5 | 5 | 5 | 5 | 5 | 4 | 3 | 4 | 3 | 4 | 5 | 4 | 3 | 4 |
| 3 | 5 | 3 | 3 | 5 | 4 | 4 | 4 | 5 | 5 | 5 | 5 | 4 | 5 | 5 | 4 | 5 | 5 |
| 5 | 5 | 5 | 5 | 5 | 5 | 6 | 6 | 6 | 6 | 5 | 5 | 5 | 2 | 5 | 5 | 5 | 5 |
| 6 | 6 | 6 | 6 | 6 | 5 | 6 | 6 | 6 | 6 | 6 | 6 | 5 | 6 | 6 | 6 | 5 | 5 |
| 5 | 5 | 4 | 4 | 4 | 4 | 4 | 4 | 4 | 4 | 4 | 4 | 4 | 4 | 4 | 4 | 4 | 4 |
| 6 | 6 | 6 | 7 | 7 | 7 | 7 | 6 | 7 | 7 | 6 | 7 | 7 | 7 | 6 | 6 | 6 | 6 |
| 5 | 5 | 5 | 5 | 5 | 5 | 4 | 4 | 5 | 5 | 5 | 5 | 5 | 3 | 2 | 2 | 3 | 5 |
| 7 | 7 | 6 | 6 | 6 | 6 | 5 | 5 | 6 | 6 | 6 | 6 | 6 | 6 | 6 | 6 | 6 | 6 |
| 2 | 3 | 4 | 5 | 5 | 6 | 6 | 6 | 4 | 4 | 5 | 5 | 5 | 3 | 3 | 5 | 4 | 4 |
| 6 | 6 | 6 | 6 | 6 | 6 | 6 | 6 | 6 | 6 | 6 | 6 | 6 | 6 | 6 | 6 | 6 | 6 |
| 5 | 5 | 5 | 6 | 6 | 6 | 5 | 5 | 4 | 4 | 4 | 4 | 4 | 5 | 5 | 5 | 5 | 6 |
| 6 | 6 | 6 | 6 | 6 | 6 | 6 | 6 | 5 | 5 | 5 | 5 | 5 | 3 | 3 | 3 | 3 | 3 |
| 6 | 6 | 6 | 6 | 6 | 6 | 6 | 6 | 6 | 6 | 6 | 6 | 6 | 6 | 6 | 6 | 6 | 6 |
| 5 | 5 | 2 | 4 | 4 | 2 | 3 | 4 | 6 | 5 | 5 | 4 | 4 | 2 | 5 | 4 | 4 | 4 |
| 7 | 7 | 7 | 7 | 7 | 7 | 6 | 7 | 5 | 5 | 6 | 5 | 6 | 4 | 6 | 5 | 6 | 6 |
| 6 | 6 | 6 | 6 | 7 | 6 | 7 | 6 | 5 | 6 | 3 | 6 | 3 | 5 | 6 | 6 | 4 | 6 |
| 6 | 6 | 5 | 5 | 5 | 5 | 4 | 4 | 3 | 5 | 5 | 5 | 5 | 4 | 4 | 3 | 4 | 5 |
| 5 | 5 | 5 | 5 | 5 | 5 | 5 | 5 | 4 | 4 | 4 | 4 | 4 | 4 | 4 | 4 | 4 | 4 |
| 6 | 6 | 6 | 6 | 6 | 6 | 6 | 6 | 6 | 6 | 6 | 6 | 6 | 6 | 6 | 6 | 6 | 6 |
| 6 | 6 | 5 | 7 | 6 | 6 | 6 | 6 | 5 | 5 | 4 | 4 | 6 | 4 | 5 | 4 | 4 | 5 |
| 7 | 6 | 6 | 4 | 4 | 4 | 6 | 5 | 6 | 5 | 6 | 6 | 5 | 5 | 5 | 5 | 5 | 5 |
| 6 | 5 | 2 | 4 | 6 | 6 | 6 | 6 | 7 | 7 | 5 | 5 | 5 | 3 | 6 | 6 | 4 | 5 |
| 6 | 6 | 6 | 6 | 6 | 6 | 6 | 6 | 6 | 6 | 2 | 6 | 6 | 6 | 6 | 7 | 6 | 6 |
| 5 | 6 | 4 | 5 | 5 | 5 | 5 | 5 | 6 | 5 | 3 | 5 | 5 | 5 | 5 | 5 | 5 | 5 |
| 6 | 5 | 4 | 4 | 4 | 5 | 4 | 3 | 6 | 5 | 6 | 6 | 6 | 4 | 3 | 2 | 2 | 1 |
| 5 | 5 | 4 | 5 | 5 | 5 | 5 | 5 | 5 | 5 | 5 | 5 | 5 | 4 | 5 | 4 | 5 | 5 |
| 6 | 6 | 6 | 6 | 6 | 6 | 6 | 6 | 6 | 6 | 2 | 6 | 6 | 6 | 6 | 7 | 6 | 6 |



[illegible]

|   |   |   |   |   |   |   |   |   |   |   |   |   |   |   |   |   |   |
|---|---|---|---|---|---|---|---|---|---|---|---|---|---|---|---|---|---|
| 6 | 5 | 4 | 4 | 4 | 5 | 6 | 6 | 4 | 5 | 6 | 5 | 6 | 6 | 6 | 5 | 6 | 6 |
| 2 | 1 | 2 | 5 | 6 |   | 6 | 6 | 6 | 6 | 2 | 5 | 3 | 6 | 6 | 6 | 2 | 6 |
| 2 | 1 | 2 | 5 | 6 | 6 | 6 | 6 | 6 | 6 | 2 | 5 | 3 | 6 | 6 | 6 | 2 | 6 |
| 6 | 6 | 6 | 6 | 6 | 6 | 6 | 6 | 6 | 6 | 6 | 7 | 4 | 7 | 7 | 7 | 7 | 7 |
| 5 | 5 | 3 | 4 | 5 | 5 | 4 | 6 | 5 | 4 | 3 | 6 | 6 | 6 | 4 | 5 | 5 | 6 |
| 1 | 2 | 2 | 5 | 5 | 5 | 3 | 3 | 4 | 1 | 3 | 7 | 7 | 2 | 3 | 4 | 4 | 5 |
| 7 | 5 | 5 | 5 | 5 | 5 | 3 | 7 | 3 | 5 | 5 | 5 | 5 | 5 | 5 | 5 | 4 | 4 |
| 6 | 6 | 6 | 6 | 6 | 6 | 6 | 5 | 6 | 5 | 4 | 6 | 6 | 3 | 5 | 5 | 3 | 6 |
| 5 | 5 | 5 | 5 | 5 | 5 | 5 | 5 | 5 | 5 | 5 | 5 | 5 | 5 | 5 | 5 | 5 | 5 |
| 2 | 4 | 3 | 2 | 2 | 4 | 2 | 4 | 2 | 3 | 2 | 2 | 2 | 2 | 2 | 2 | 2 | 2 |
| 7 | 6 | 6 | 7 | 7 | 6 | 7 | 6 | 6 | 6 | 6 | 6 |   | 5 | 5 | 5 | 6 | 5 |
| 2 | 3 | 3 | 5 | 5 | 5 | 5 | 5 | 4 | 3 | 3 | 4 | 4 | 5 | 5 | 5 | 5 | 5 |
| 6 | 6 | 6 | 6 | 6 | 6 | 6 | 6 | 6 | 4 | 3 | 6 | 6 | 6 | 6 | 3 | 3 | 3 |
| 6 | 6 | 5 | 5 | 5 | 5 | 5 | 6 | 5 | 4 | 4 | 5 | 5 | 5 | 5 | 6 | 5 | 5 |
| 5 | 5 | 5 | 5 | 5 | 5 | 5 | 4 | 5 | 5 | 5 | 5 | 5 | 5 | 5 | 5 | 6 | 6 |
| 6 | 6 | 6 | 6 | 6 | 6 |   | 5 | 6 | 5 | 3 | 7 | 4 |   | 7 | 5 | 5 | 6 |
| 2 | 3 | 3 | 5 | 5 | 5 | 5 | 5 | 4 | 3 | 3 | 4 | 4 | 5 | 5 | 5 | 5 | 5 |
| 6 | 6 | 6 | 6 | 6 | 6 | 5 | 5 | 6 | 6 | 6 | 7 | 5 | 5 | 6 | 5 | 5 | 4 |

E1 E2 E3 E4 E5 E6

|   |   |   |   |   |   |
|---|---|---|---|---|---|
| 5 | 4 | 4 | 4 | 5 | 5 |
| 2 | 2 | 1 | 4 | 3 | 2 |
| 4 | 4 | 4 | 4 | 4 | 4 |
| 3 | 5 | 4 | 4 | 5 | 6 |
| 6 | 6 | 7 | 7 | 7 | 7 |
| 4 | 4 | 4 | 7 | 4 | 4 |
| 4 | 4 | 4 | 4 | 4 | 4 |
| 3 | 5 | 4 | 3 | 5 | 5 |
| 5 | 4 | 6 | 4 | 6 | 6 |
| 6 | 5 | 6 | 6 | 6 | 6 |
| 5 | 4 | 5 | 7 | 6 | 6 |
| 1 | 1 | 5 | 3 | 5 | 3 |
| 5 | 5 | 5 | 5 | 5 | 4 |
| 2 | 4 | 5 | 5 | 5 | 5 |
| 3 | 1 | 3 | 4 | 3 | 4 |
| 4 | 4 | 4 | 4 | 5 | 5 |
| 4 | 4 | 4 | 4 | 4 | 4 |
| 5 | 5 | 6 | 5 | 5 | 6 |
| 4 | 4 | 4 | 4 | 4 | 4 |
| 4 | 4 | 4 | 4 | 4 | 4 |
| 4 | 3 | 4 | 4 | 4 | 4 |
| 4 | 3 | 4 | 4 | 3 | 5 |
| 5 | 6 | 6 | 6 | 6 | 6 |
| 5 | 5 | 5 | 6 | 5 | 6 |
| 6 | 6 | 7 | 4 | 6 | 6 |
| 4 | 4 | 1 | 1 | 2 | 4 |
| 4 | 4 | 4 | 4 | 4 | 5 |
| 5 | 4 | 6 | 5 | 5 | 4 |
| 5 | 5 | 7 | 7 | 6 | 6 |
| 5 | 5 | 5 | 4 | 4 | 4 |
| 4 | 5 | 4 | 5 | 5 | 4 |
| 5 | 5 | 5 | 5 | 6 | 6 |
| 6 | 5 | 6 | 6 | 6 | 6 |
| 5 | 5 | 6 | 4 | 4 | 4 |
| 4 | 3 | 5 | 5 | 4 | 3 |
| 4 | 4 | 4 | 4 | 4 | 4 |
| 4 | 4 | 4 | 5 | 6 | 7 |
| 4 | 5 | 5 | 6 |   | 4 |
| 5 | 4 | 6 | 5 | 6 | 4 |

|   |   |   |   |   |   |
|---|---|---|---|---|---|
| 3 | 5 | 4 | 4 | 5 | 6 |
| 4 | 4 | 4 | 5 | 5 | 4 |
| 6 | 6 | 6 | 6 | 6 | 6 |
| 5 | 5 | 5 | 5 | 4 | 4 |
| 4 | 4 | 5 | 4 | 4 | 5 |
| 5 | 5 | 5 | 5 | 6 | 4 |
| 5 | 5 | 5 | 5 | 5 | 6 |
| 5 | 6 | 6 | 6 | 6 | 6 |
| 4 | 5 | 5 | 5 | 5 | 3 |
| 4 | 4 | 7 | 6 | 7 | 6 |
| 4 | 4 | 4 | 4 | 4 | 4 |
| 6 | 6 | 6 | 6 | 5 | 5 |
| 4 | 4 | 5 | 5 | 6 | 4 |
| 4 | 4 | 5 | 5 | 4 | 4 |
| 4 | 4 | 5 | 5 | 5 | 4 |
| 4 | 4 | 4 | 4 | 5 | 5 |
| 4 | 4 | 5 | 5 | 5 | 4 |
| 6 | 5 | 6 | 6 | 7 | 7 |
| 4 | 4 | 4 | 4 | 4 | 4 |
| 6 | 5 | 5 | 4 | 4 | 4 |
|   |   | 4 | 4 | 6 | 4 |
| 3 | 3 | 4 | 4 | 4 | 4 |
| 5 | 5 | 6 | 6 | 5 | 5 |
| 6 | 6 | 6 | 6 | 6 | 6 |
| 5 | 4 | 5 | 5 | 5 | 5 |
| 4 | 3 | 4 | 3 | 4 | 3 |
| 7 | 6 | 6 | 5 | 6 | 6 |
| 2 | 2 | 4 | 4 | 3 | 4 |
| 6 | 7 | 6 | 6 | 7 | 6 |
| 5 | 6 | 5 | 6 | 5 | 6 |
| 5 | 5 | 6 | 6 | 7 | 5 |
| 7 | 5 | 7 | 7 | 7 | 6 |
| 3 | 4 | 4 | 4 | 6 | 4 |
| 5 | 5 | 6 | 5 | 5 | 6 |
| 5 | 5 | 6 | 6 | 5 | 6 |
| 4 | 4 | 4 | 4 | 4 | 4 |
| 4 | 3 | 5 | 4 | 5 | 5 |
| 3 | 5 | 4 | 5 | 5 | 6 |
| 5 | 5 | 5 | 4 | 5 | 5 |
| 4 | 4 | 4 | 4 | 4 | 4 |

|   |   |   |   |   |   |
|---|---|---|---|---|---|
| 2 | 3 | 3 | 3 | 3 | 3 |
|---|---|---|---|---|---|

|   |   |   |   |   |   |
|---|---|---|---|---|---|
| 3 | 2 | 5 | 5 | 3 | 5 |
|---|---|---|---|---|---|

|   |   |   |   |   |   |
|---|---|---|---|---|---|
| 4 | 4 | 4 | 3 | 4 | 4 |
|---|---|---|---|---|---|

|   |   |   |   |   |   |
|---|---|---|---|---|---|
| 4 | 4 | 4 | 4 | 4 | 4 |
|---|---|---|---|---|---|

|   |   |   |   |   |   |
|---|---|---|---|---|---|
| 2 | 2 | 4 | 4 | 4 | 4 |
|---|---|---|---|---|---|

|   |   |   |   |   |   |
|---|---|---|---|---|---|
| 4 | 4 | 4 | 4 | 4 | 4 |
|---|---|---|---|---|---|

|   |   |   |   |   |   |
|---|---|---|---|---|---|
| 4 | 4 | 4 | 4 | 4 | 4 |
|---|---|---|---|---|---|

|   |   |   |   |   |   |
|---|---|---|---|---|---|
| 3 | 5 | 4 | 4 | 5 | 6 |
|---|---|---|---|---|---|

|   |   |   |   |   |   |
|---|---|---|---|---|---|
| 4 | 4 | 4 | 4 | 5 | 4 |
|---|---|---|---|---|---|

|   |   |   |   |   |   |
|---|---|---|---|---|---|
| 6 | 6 | 6 | 6 | 5 | 6 |
|---|---|---|---|---|---|

|   |   |   |   |   |   |
|---|---|---|---|---|---|
| 3 | 5 | 4 | 5 | 5 | 6 |
|---|---|---|---|---|---|

|   |   |   |   |   |   |
|---|---|---|---|---|---|
| 5 | 4 | 5 | 6 | 4 | 5 |
|---|---|---|---|---|---|

|  |  |  |   |   |   |
|--|--|--|---|---|---|
|  |  |  | 5 | 6 | 6 |
|--|--|--|---|---|---|

|   |   |   |   |   |   |
|---|---|---|---|---|---|
| 4 | 4 | 4 | 4 | 4 | 4 |
|---|---|---|---|---|---|

|   |   |   |   |   |   |
|---|---|---|---|---|---|
| 4 | 5 | 4 | 4 | 5 | 5 |
|---|---|---|---|---|---|

|   |   |   |   |   |   |
|---|---|---|---|---|---|
| 5 | 6 | 6 | 6 | 4 | 5 |
|---|---|---|---|---|---|

|   |   |   |   |   |   |
|---|---|---|---|---|---|
| 4 | 4 | 5 | 5 | 4 | 4 |
|---|---|---|---|---|---|

|   |   |   |   |   |   |
|---|---|---|---|---|---|
| 5 | 4 | 7 | 7 | 6 | 4 |
|---|---|---|---|---|---|

|   |   |   |   |   |   |
|---|---|---|---|---|---|
| 6 | 1 | 5 | 5 | 6 | 2 |
|---|---|---|---|---|---|

|   |   |   |  |   |   |
|---|---|---|--|---|---|
| 4 | 5 | 5 |  | 6 | 5 |
|---|---|---|--|---|---|

|   |   |   |   |   |   |
|---|---|---|---|---|---|
| 4 | 4 | 4 | 5 | 4 | 6 |
|---|---|---|---|---|---|

|   |   |   |   |   |   |
|---|---|---|---|---|---|
| 4 | 4 | 1 | 1 | 3 | 2 |
|---|---|---|---|---|---|

|   |   |   |   |   |   |
|---|---|---|---|---|---|
| 4 | 5 | 6 | 5 | 7 | 6 |
|---|---|---|---|---|---|

|   |   |   |   |   |   |
|---|---|---|---|---|---|
| 3 | 4 | 4 | 4 | 4 | 4 |
|---|---|---|---|---|---|

|   |   |   |   |   |   |
|---|---|---|---|---|---|
| 5 | 6 | 6 | 6 | 5 | 5 |
|---|---|---|---|---|---|

|   |   |   |   |   |   |
|---|---|---|---|---|---|
| 6 | 1 | 4 | 4 | 4 | 5 |
|---|---|---|---|---|---|

|   |   |   |   |   |   |
|---|---|---|---|---|---|
| 4 | 4 | 4 | 4 | 4 | 5 |
|---|---|---|---|---|---|

|   |   |   |   |   |   |
|---|---|---|---|---|---|
| 5 | 5 | 5 | 4 | 4 | 4 |
|---|---|---|---|---|---|

|   |   |   |   |   |   |
|---|---|---|---|---|---|
| 6 | 5 | 7 | 7 | 6 | 5 |
|---|---|---|---|---|---|

|   |   |   |   |   |   |
|---|---|---|---|---|---|
| 2 | 2 | 4 | 4 | 4 | 4 |
|---|---|---|---|---|---|

|   |   |   |   |   |   |
|---|---|---|---|---|---|
| 4 | 4 | 4 | 4 | 4 | 4 |
|---|---|---|---|---|---|

|   |   |   |   |   |   |
|---|---|---|---|---|---|
| 4 | 3 | 4 | 4 | 5 | 5 |
|---|---|---|---|---|---|

|   |   |   |   |   |   |
|---|---|---|---|---|---|
| 4 | 4 | 4 | 4 | 4 | 4 |
|---|---|---|---|---|---|

|   |   |   |   |   |   |
|---|---|---|---|---|---|
| 5 | 5 | 4 | 4 | 4 | 5 |
|---|---|---|---|---|---|

|   |   |   |   |   |   |
|---|---|---|---|---|---|
| 4 | 4 | 4 | 4 | 4 | 4 |
|---|---|---|---|---|---|

|   |   |   |   |   |   |
|---|---|---|---|---|---|
| 5 | 5 | 4 | 4 | 4 | 5 |
|---|---|---|---|---|---|

|   |   |   |   |   |   |
|---|---|---|---|---|---|
| 4 | 4 | 5 | 4 | 5 | 5 |
|---|---|---|---|---|---|

|   |   |   |   |   |   |
|---|---|---|---|---|---|
| 5 | 5 | 4 | 4 | 4 | 4 |
|---|---|---|---|---|---|

|   |   |   |   |   |   |
|---|---|---|---|---|---|
| 5 | 5 | 5 | 5 | 7 | 5 |
|---|---|---|---|---|---|

|   |   |   |   |   |   |
|---|---|---|---|---|---|
| 4 | 5 | 5 | 4 | 5 | 4 |
| 5 | 5 | 6 | 5 | 5 | 6 |
| 6 | 5 | 5 | 4 | 4 | 4 |
| 4 | 4 | 4 | 4 | 7 | 5 |
| 4 | 4 | 5 | 4 | 4 | 4 |
| 4 | 4 | 4 | 4 | 4 | 4 |
| 3 | 3 | 3 | 3 | 4 | 4 |
| 5 | 5 | 5 | 5 | 5 | 5 |
| 5 | 5 | 7 | 7 | 6 | 6 |

|   |   |   |   |   |   |
|---|---|---|---|---|---|
| 5 | 4 | 6 | 6 | 5 | 5 |
| 4 | 5 | 6 | 5 | 7 | 6 |
| 5 | 5 | 5 | 4 | 5 | 4 |
| 3 | 3 | 4 | 4 | 4 | 4 |
| 4 | 4 | 5 | 5 | 5 | 5 |
| 4 | 3 | 4 | 3 | 4 | 3 |
| 6 | 6 | 4 | 4 | 6 | 4 |
| 4 | 4 | 4 | 4 | 4 | 5 |
| 5 | 4 | 5 | 5 | 5 | 6 |
| 5 | 4 | 4 | 4 | 5 | 4 |
| 3 | 3 | 3 | 3 | 4 | 4 |
| 4 | 3 | 4 | 4 | 4 | 5 |
| 5 | 5 | 5 | 5 | 5 | 5 |
| 4 | 4 | 5 | 4 | 4 | 4 |
| 5 | 5 | 4 | 4 | 4 | 5 |
| 4 | 2 | 4 | 4 | 4 | 5 |
| 4 | 4 | 5 | 5 | 6 | 6 |
| 6 | 6 | 6 | 6 | 5 | 5 |
| 6 | 5 | 5 | 4 | 5 | 4 |
| 4 | 4 | 6 | 5 | 5 | 4 |
| 4 | 4 | 5 | 4 | 4 | 5 |
| 3 | 3 | 5 | 5 | 5 | 4 |
| 5 | 5 | 5 | 5 | 5 | 5 |
| 5 | 5 | 5 | 5 | 5 | 5 |
| 4 | 4 | 6 | 5 | 5 | 4 |
| 5 | 5 | 5 | 5 | 5 | 5 |
| 5 | 6 | 6 | 5 | 5 | 5 |
| 5 | 4 | 6 | 5 | 6 | 5 |
| 4 | 4 | 5 | 5 | 5 | 3 |

|   |   |   |   |   |   |
|---|---|---|---|---|---|
| 3 | 3 | 5 | 5 | 5 | 4 |
| 5 | 5 | 5 | 4 | 7 | 4 |
| 4 | 4 | 4 | 4 | 5 | 4 |
| 5 | 5 | 4 | 4 | 4 | 5 |
| 5 | 5 | 5 | 5 | 4 | 4 |
| 5 | 4 | 4 | 4 | 3 | 3 |
| 6 | 6 | 6 | 6 | 6 | 6 |
| 4 | 4 | 4 | 4 | 4 | 4 |
| 5 | 5 | 5 | 5 | 6 | 5 |
| 5 | 6 | 6 | 5 | 5 | 5 |
| 3 | 3 | 4 | 4 | 4 | 4 |
| 5 | 4 | 6 | 4 | 6 | 5 |
| 4 | 4 | 5 | 4 | 4 | 4 |
| 4 | 4 | 5 | 4 | 4 | 5 |
| 6 | 1 | 4 | 4 | 4 | 5 |
| 4 | 4 | 4 | 4 | 4 | 5 |
| 4 | 4 | 4 | 4 | 4 | 4 |
| 5 | 5 | 6 | 6 | 6 | 5 |
| 4 | 4 | 5 | 4 | 5 | 5 |
| 5 | 5 | 6 | 7 | 7 | 7 |
| 4 | 4 | 6 | 5 | 5 | 4 |
| 5 | 4 | 7 | 7 | 6 | 4 |
| 5 | 5 | 4 | 4 | 4 | 4 |
| 6 | 4 | 5 | 6 | 5 | 5 |
| 4 | 4 | 4 | 4 | 4 | 4 |
| 5 | 5 | 6 | 6 | 6 | 6 |
| 4 | 4 | 4 | 4 | 4 | 4 |
| 4 | 4 | 4 | 4 | 4 | 4 |
| 5 | 5 | 5 | 5 | 6 | 4 |
| 1 | 1 | 1 | 1 | 6 | 6 |
| 6 | 5 | 5 | 4 | 4 | 4 |
| 4 | 5 | 4 | 4 | 4 | 5 |
| 4 | 2 | 6 | 6 | 6 | 6 |
| 4 | 4 | 4 | 4 | 4 | 5 |
| 5 | 5 | 5 | 5 | 6 | 7 |
| 3 | 3 | 4 | 4 | 4 | 3 |
| 4 | 5 | 5 | 5 | 6 | 5 |
| 5 | 5 | 4 | 4 | 4 | 5 |
| 5 | 4 |   | 5 | 5 | 6 |
| 3 | 4 | 4 | 4 | 4 | 4 |

|   |   |   |   |   |   |
|---|---|---|---|---|---|
| 4 | 4 | 4 | 4 | 4 | 4 |
| 3 | 3 | 4 | 4 | 4 | 4 |
| 6 | 4 | 5 | 5 | 4 | 4 |
| 5 | 4 | 6 | 7 | 6 | 7 |
| 6 | 7 | 6 | 4 | 6 | 5 |
| 5 | 5 | 5 | 6 | 6 | 6 |
| 4 | 5 | 4 | 4 | 6 | 4 |
| 4 | 4 | 6 | 6 | 6 | 4 |
| 4 | 4 | 4 | 4 | 4 | 4 |
| 5 | 5 | 5 | 5 | 5 | 4 |
| 3 | 3 | 4 | 4 | 4 | 4 |
| 4 | 4 | 4 | 4 | 4 | 4 |
| 4 | 4 | 4 | 5 | 5 |   |
| 4 | 4 | 5 | 5 | 6 | 3 |
| 4 | 4 | 4 | 4 | 4 | 4 |
| 6 | 6 | 6 | 6 | 6 | 6 |
| 4 | 4 | 5 | 5 | 5 | 5 |
| 7 | 7 | 7 | 7 | 7 | 7 |
| 5 | 5 | 5 | 5 | 6 | 5 |
| 6 | 1 | 4 | 4 | 4 | 5 |
| 5 | 4 | 4 | 5 | 5 | 5 |
| 4 | 5 | 4 | 4 | 4 | 4 |
|   |   |   |   |   |   |
| 4 | 4 | 5 | 5 | 5 | 6 |
| 2 | 2 | 2 | 2 | 2 | 2 |
| 4 | 4 | 4 | 4 | 4 | 4 |
| 6 | 7 | 6 | 6 | 6 | 7 |
| 4 | 4 | 4 | 4 | 4 | 5 |
| 4 | 4 | 4 | 4 | 4 | 4 |
| 4 | 4 | 5 | 4 | 5 | 6 |
| 4 | 4 | 5 | 5 | 6 | 6 |
| 4 | 4 | 4 | 4 | 4 | 4 |
| 5 | 5 | 5 | 5 | 5 | 5 |
| 4 | 4 | 4 | 4 | 4 | 4 |
| 5 | 4 | 4 | 4 | 3 | 3 |
| 4 | 4 | 4 | 3 | 5 | 3 |
| 6 | 5 | 5 | 4 | 5 | 4 |
| 4 | 4 | 5 | 5 | 5 | 5 |
| 5 | 2 | 6 | 3 | 6 | 2 |
| 5 | 4 | 6 | 5 | 4 | 5 |



|   |   |   |   |   |   |
|---|---|---|---|---|---|
| 5 | 4 | 7 | 7 | 7 | 7 |
| 2 | 2 | 3 | 4 | 3 | 3 |
| 4 | 4 | 4 | 4 | 4 | 4 |
| 6 | 5 | 7 | 7 | 7 | 5 |
| 6 | 4 | 6 | 6 | 4 | 6 |
| 4 | 5 | 5 | 5 | 6 | 4 |
| 5 | 4 | 7 | 7 | 7 | 7 |
| 5 | 4 | 4 | 4 | 4 | 5 |
| 4 | 4 | 4 | 4 | 4 | 3 |
| 4 | 4 | 5 | 5 | 5 | 5 |
| 5 | 5 | 5 | 4 | 5 | 5 |
| 6 | 6 | 7 | 5 | 6 | 6 |
| 6 | 6 | 6 | 6 | 6 | 6 |
| 4 | 5 | 5 | 4 | 5 | 4 |
| 5 | 4 | 5 | 4 | 4 | 5 |
| 3 | 3 | 5 | 5 | 5 | 3 |
| 7 | 7 | 6 | 6 | 6 | 5 |
| 5 | 5 | 5 | 5 | 5 | 5 |
| 5 | 4 | 7 | 7 | 7 | 7 |
| 4 | 4 | 4 | 4 | 4 | 4 |
| 5 | 5 | 6 | 6 | 5 | 6 |
| 5 | 5 | 4 | 5 | 5 | 5 |
| 4 | 4 | 4 | 4 | 4 | 4 |
| 4 | 4 | 4 | 4 | 4 | 5 |
| 3 | 3 | 4 | 3 | 4 | 3 |
| 5 | 5 | 5 | 5 | 5 | 5 |
| 4 | 4 | 4 | 4 | 4 | 4 |
| 5 | 5 | 6 | 4 | 5 | 5 |
| 2 | 2 | 4 | 4 | 4 | 4 |
| 3 | 3 | 4 | 5 | 5 | 4 |
| 4 | 4 | 4 | 4 | 4 | 4 |
| 6 | 6 | 6 | 6 | 6 | 6 |
| 4 | 4 | 4 | 4 | 5 | 4 |
| 6 | 7 | 6 | 4 | 6 | 6 |
| 4 | 5 | 5 | 5 | 5 | 3 |
| 5 | 5 | 6 | 6 | 5 | 6 |
| 4 | 4 | 4 | 4 | 4 | 4 |
| 5 | 4 | 4 | 4 | 4 | 4 |
| 3 | 3 | 4 | 4 | 4 | 4 |
| 5 | 5 | 6 | 6 | 5 | 6 |

|   |   |   |   |   |   |
|---|---|---|---|---|---|
| 3 | 3 | 4 | 5 | 4 | 3 |
| 7 | 7 | 7 | 7 | 7 | 7 |
| 6 | 6 | 6 | 4 | 6 | 6 |
| 5 | 4 | 6 | 5 | 6 | 7 |
| 7 | 6 | 4 | 4 | 5 | 5 |
| 5 | 4 | 4 | 4 | 4 | 4 |
| 4 | 4 | 4 | 4 | 4 | 4 |
| 4 | 4 | 4 | 4 | 4 | 4 |
| 4 | 3 | 4 | 3 | 4 | 3 |
| 4 | 4 | 4 | 4 | 4 | 4 |
| 1 | 1 | 4 | 4 | 4 | 2 |
| 4 | 4 | 5 | 5 | 5 | 5 |
| 6 | 6 | 5 | 5 | 6 | 6 |
| 5 | 6 | 4 | 5 | 5 | 5 |
| 4 | 4 | 4 | 4 | 4 | 4 |
| 4 | 4 | 5 | 4 | 4 | 6 |
| 3 | 5 | 4 | 4 | 5 | 6 |
| 5 | 4 | 3 | 4 | 5 | 5 |
| 6 | 6 | 6 | 4 | 6 | 6 |
| 6 | 5 | 5 | 5 | 5 | 5 |
| 7 | 5 | 6 | 6 | 6 | 7 |
| 4 | 4 | 4 | 4 | 4 | 4 |
| 5 | 4 | 5 | 5 | 5 | 5 |
| 4 | 4 | 5 | 5 | 5 | 5 |
| 5 | 5 | 5 | 4 | 6 | 4 |
| 6 | 6 | 7 | 6 | 7 | 6 |
| 5 | 4 | 5 | 4 | 5 | 5 |
| 4 | 4 | 4 | 4 | 4 | 4 |
| 6 | 5 | 5 | 5 | 5 | 5 |
| 4 | 3 | 4 | 4 | 4 | 5 |
| 5 | 5 | 4 | 4 | 5 | 5 |
| 5 | 3 | 4 | 4 | 5 | 4 |
| 3 | 3 | 3 | 3 | 4 | 4 |
| 5 | 6 | 6 | 6 | 6 | 6 |
| 4 | 4 | 4 | 4 | 4 | 4 |
| 5 | 6 | 4 | 5 | 5 | 5 |
| 4 | 4 | 5 | 5 | 4 | 5 |
| 4 | 4 | 4 | 5 | 4 | 4 |
| 7 | 4 | 7 | 7 | 7 | 7 |
| 4 | 4 | 4 | 4 | 4 | 4 |

|   |   |   |   |   |   |
|---|---|---|---|---|---|
| 7 | 7 | 6 | 6 | 7 | 6 |
| 5 | 5 | 7 | 7 | 7 | 6 |
| 5 | 5 | 7 | 7 | 7 | 6 |
| 4 | 4 | 5 | 5 | 6 | 6 |
| 4 | 5 | 5 | 3 | 5 | 4 |
| 5 | 4 | 4 | 6 | 4 | 5 |
| 6 | 6 | 6 | 6 |   | 4 |
| 6 | 6 | 7 | 5 | 6 | 6 |
| 4 | 4 | 4 | 4 | 4 | 4 |
| 1 | 3 | 2 | 2 | 2 | 4 |
| 4 | 4 | 4 | 4 | 4 | 4 |
| 4 | 4 | 4 | 4 | 5 | 5 |
| 4 | 4 | 5 | 5 | 5 | 5 |
| 4 | 5 | 5 | 5 | 5 | 5 |
| 4 | 4 | 4 | 4 | 4 | 4 |
| 4 | 4 | 5 | 5 | 4 | 4 |
| 4 | 4 | 4 | 4 | 5 | 5 |
| 7 | 6 | 7 | 7 | 6 | 4 |
